# Supplementary material for: Drivers of Regional Bacterial Community Structure and Diversity in the Northwest Atlantic Ocean
Source: Front Microbiol. 2019 Feb 21;10:281. doi: 10.3389/fmicb.2019.00281 (PMC6393369; doi:10.3389/fmicb.2019.00281)
Supplement: Supplementary file 3 [file Table_3.xlsx]

## Sheet: Sheet1
List of dual-indexing Illumina fusion primers used for Multiplexing samples for Illumina Sequencing
Left arm P5 adapter	i5 name	i5	Right arm P5 adapter	Forward Primer	Final name	Fusion sequence (5'-3')
AATGATACGGCGACCACCGAGATCTACAC	S502	CTCTCTAT	TCGTCGGCAGCGTCAGATGTGTATAAGAGACAG	ACGCGHNRAACCTTACC	B969F-S502	AATGATACGGCGACCACCGAGATCTACACCTCTCTATTCGTCGGCAGCGTCAGATGTGTATAAGAGACAGACGCGHNRAACCTTACC
AATGATACGGCGACCACCGAGATCTACAC	S503	TATCCTCT	TCGTCGGCAGCGTCAGATGTGTATAAGAGACAG	ACGCGHNRAACCTTACC	B969F-S503	AATGATACGGCGACCACCGAGATCTACACTATCCTCTTCGTCGGCAGCGTCAGATGTGTATAAGAGACAGACGCGHNRAACCTTACC
AATGATACGGCGACCACCGAGATCTACAC	S505	GTAAGGAG	TCGTCGGCAGCGTCAGATGTGTATAAGAGACAG	ACGCGHNRAACCTTACC	B969F-S505	AATGATACGGCGACCACCGAGATCTACACGTAAGGAGTCGTCGGCAGCGTCAGATGTGTATAAGAGACAGACGCGHNRAACCTTACC
AATGATACGGCGACCACCGAGATCTACAC	S506	ACTGCATA	TCGTCGGCAGCGTCAGATGTGTATAAGAGACAG	ACGCGHNRAACCTTACC	B969F-S506	AATGATACGGCGACCACCGAGATCTACACACTGCATATCGTCGGCAGCGTCAGATGTGTATAAGAGACAGACGCGHNRAACCTTACC
AATGATACGGCGACCACCGAGATCTACAC	S507	AAGGAGTA	TCGTCGGCAGCGTCAGATGTGTATAAGAGACAG	ACGCGHNRAACCTTACC	B969F-S507	AATGATACGGCGACCACCGAGATCTACACAAGGAGTATCGTCGGCAGCGTCAGATGTGTATAAGAGACAGACGCGHNRAACCTTACC
AATGATACGGCGACCACCGAGATCTACAC	S508	CTAAGCCT	TCGTCGGCAGCGTCAGATGTGTATAAGAGACAG	ACGCGHNRAACCTTACC	B969F-S508	AATGATACGGCGACCACCGAGATCTACACCTAAGCCTTCGTCGGCAGCGTCAGATGTGTATAAGAGACAGACGCGHNRAACCTTACC
AATGATACGGCGACCACCGAGATCTACAC	S510	CGTCTAAT	TCGTCGGCAGCGTCAGATGTGTATAAGAGACAG	ACGCGHNRAACCTTACC	B969F-S510	AATGATACGGCGACCACCGAGATCTACACCGTCTAATTCGTCGGCAGCGTCAGATGTGTATAAGAGACAGACGCGHNRAACCTTACC
AATGATACGGCGACCACCGAGATCTACAC	S511	TCTCTCCG	TCGTCGGCAGCGTCAGATGTGTATAAGAGACAG	ACGCGHNRAACCTTACC	B969F-S511	AATGATACGGCGACCACCGAGATCTACACTCTCTCCGTCGTCGGCAGCGTCAGATGTGTATAAGAGACAGACGCGHNRAACCTTACC
AATGATACGGCGACCACCGAGATCTACAC	S513	TCGACTAG	TCGTCGGCAGCGTCAGATGTGTATAAGAGACAG	ACGCGHNRAACCTTACC	B969F-S513	AATGATACGGCGACCACCGAGATCTACACTCGACTAGTCGTCGGCAGCGTCAGATGTGTATAAGAGACAGACGCGHNRAACCTTACC
AATGATACGGCGACCACCGAGATCTACAC	S515	TTCTAGCT	TCGTCGGCAGCGTCAGATGTGTATAAGAGACAG	ACGCGHNRAACCTTACC	B969F-S515	AATGATACGGCGACCACCGAGATCTACACTTCTAGCTTCGTCGGCAGCGTCAGATGTGTATAAGAGACAGACGCGHNRAACCTTACC
AATGATACGGCGACCACCGAGATCTACAC	S516	CCTAGAGT	TCGTCGGCAGCGTCAGATGTGTATAAGAGACAG	ACGCGHNRAACCTTACC	B969F-S516	AATGATACGGCGACCACCGAGATCTACACCCTAGAGTTCGTCGGCAGCGTCAGATGTGTATAAGAGACAGACGCGHNRAACCTTACC
AATGATACGGCGACCACCGAGATCTACAC	S517	GCGTAAGA	TCGTCGGCAGCGTCAGATGTGTATAAGAGACAG	ACGCGHNRAACCTTACC	B969F-S517	AATGATACGGCGACCACCGAGATCTACACGCGTAAGATCGTCGGCAGCGTCAGATGTGTATAAGAGACAGACGCGHNRAACCTTACC
AATGATACGGCGACCACCGAGATCTACAC	S518	CTATTAAG	TCGTCGGCAGCGTCAGATGTGTATAAGAGACAG	ACGCGHNRAACCTTACC	B969F-S518	AATGATACGGCGACCACCGAGATCTACACCTATTAAGTCGTCGGCAGCGTCAGATGTGTATAAGAGACAGACGCGHNRAACCTTACC
AATGATACGGCGACCACCGAGATCTACAC	S520	AAGGCTAT	TCGTCGGCAGCGTCAGATGTGTATAAGAGACAG	ACGCGHNRAACCTTACC	B969F-S520	AATGATACGGCGACCACCGAGATCTACACAAGGCTATTCGTCGGCAGCGTCAGATGTGTATAAGAGACAGACGCGHNRAACCTTACC
AATGATACGGCGACCACCGAGATCTACAC	S521	GAGCCTTA	TCGTCGGCAGCGTCAGATGTGTATAAGAGACAG	ACGCGHNRAACCTTACC	B969F-S521	AATGATACGGCGACCACCGAGATCTACACGAGCCTTATCGTCGGCAGCGTCAGATGTGTATAAGAGACAGACGCGHNRAACCTTACC
AATGATACGGCGACCACCGAGATCTACAC	S522	TTATGCGA	TCGTCGGCAGCGTCAGATGTGTATAAGAGACAG	ACGCGHNRAACCTTACC	B969F-S522	AATGATACGGCGACCACCGAGATCTACACTTATGCGATCGTCGGCAGCGTCAGATGTGTATAAGAGACAGACGCGHNRAACCTTACC
Left arm P7 adapter	i7 name	i7	Right arm P7 adapter	Reverse Primer	Final name	Fusion sequence (5'-3')
CAAGCAGAAGACGGCATACGAGAT	N701	TCGCCTTA	GTCTCGTGGGCTCGGAGATGTGTATAAGAGACAG	ACGGGCRGTGWGTRCAA	BA1406R-N701	CAAGCAGAAGACGGCATACGAGATTCGCCTTAGTCTCGTGGGCTCGGAGATGTGTATAAGAGACAGACGGGCRGTGWGTRCAA
CAAGCAGAAGACGGCATACGAGAT	N702	CTAGTACG	GTCTCGTGGGCTCGGAGATGTGTATAAGAGACAG	ACGGGCRGTGWGTRCAA	BA1406R-N702	CAAGCAGAAGACGGCATACGAGATCTAGTACGGTCTCGTGGGCTCGGAGATGTGTATAAGAGACAGACGGGCRGTGWGTRCAA
CAAGCAGAAGACGGCATACGAGAT	N703	TTCTGCCT	GTCTCGTGGGCTCGGAGATGTGTATAAGAGACAG	ACGGGCRGTGWGTRCAA	BA1406R-N703	CAAGCAGAAGACGGCATACGAGATTTCTGCCTGTCTCGTGGGCTCGGAGATGTGTATAAGAGACAGACGGGCRGTGWGTRCAA
CAAGCAGAAGACGGCATACGAGAT	N704	GCTCAGGA	GTCTCGTGGGCTCGGAGATGTGTATAAGAGACAG	ACGGGCRGTGWGTRCAA	BA1406R-N704	CAAGCAGAAGACGGCATACGAGATGCTCAGGAGTCTCGTGGGCTCGGAGATGTGTATAAGAGACAGACGGGCRGTGWGTRCAA
CAAGCAGAAGACGGCATACGAGAT	N705	AGGAGTCC	GTCTCGTGGGCTCGGAGATGTGTATAAGAGACAG	ACGGGCRGTGWGTRCAA	BA1406R-N705	CAAGCAGAAGACGGCATACGAGATAGGAGTCCGTCTCGTGGGCTCGGAGATGTGTATAAGAGACAGACGGGCRGTGWGTRCAA
Left arm P7 adapter	i7 name	i7	Right arm P7 adapter	Reverse Primer	Final name	Fusion sequence (5'-3')
CAAGCAGAAGACGGCATACGAGAT	N706	CATGCCTA	GTCTCGTGGGCTCGGAGATGTGTATAAGAGACAG	ACGGGCRGTGWGTRCAA	BA1406R-N706	CAAGCAGAAGACGGCATACGAGATCATGCCTAGTCTCGTGGGCTCGGAGATGTGTATAAGAGACAGACGGGCRGTGWGTRCAA
CAAGCAGAAGACGGCATACGAGAT	N707	GTAGAGAG	GTCTCGTGGGCTCGGAGATGTGTATAAGAGACAG	ACGGGCRGTGWGTRCAA	BA1406R-N707	CAAGCAGAAGACGGCATACGAGATGTAGAGAGGTCTCGTGGGCTCGGAGATGTGTATAAGAGACAGACGGGCRGTGWGTRCAA
CAAGCAGAAGACGGCATACGAGAT	N710	CAGCCTCG	GTCTCGTGGGCTCGGAGATGTGTATAAGAGACAG	ACGGGCRGTGWGTRCAA	BA1406R-N710	CAAGCAGAAGACGGCATACGAGATCAGCCTCGGTCTCGTGGGCTCGGAGATGTGTATAAGAGACAGACGGGCRGTGWGTRCAA
CAAGCAGAAGACGGCATACGAGAT	N711	TGCCTCTT	GTCTCGTGGGCTCGGAGATGTGTATAAGAGACAG	ACGGGCRGTGWGTRCAA	BA1406R-N711	CAAGCAGAAGACGGCATACGAGATTGCCTCTTGTCTCGTGGGCTCGGAGATGTGTATAAGAGACAGACGGGCRGTGWGTRCAA
CAAGCAGAAGACGGCATACGAGAT	N712	TCCTCTAC	GTCTCGTGGGCTCGGAGATGTGTATAAGAGACAG	ACGGGCRGTGWGTRCAA	BA1406R-N712	CAAGCAGAAGACGGCATACGAGATTCCTCTACGTCTCGTGGGCTCGGAGATGTGTATAAGAGACAGACGGGCRGTGWGTRCAA
CAAGCAGAAGACGGCATACGAGAT	N714	TCATGAGC	GTCTCGTGGGCTCGGAGATGTGTATAAGAGACAG	ACGGGCRGTGWGTRCAA	BA1406R-N714	CAAGCAGAAGACGGCATACGAGATTCATGAGCGTCTCGTGGGCTCGGAGATGTGTATAAGAGACAGACGGGCRGTGWGTRCAA
CAAGCAGAAGACGGCATACGAGAT	N715	CCTGAGAT	GTCTCGTGGGCTCGGAGATGTGTATAAGAGACAG	ACGGGCRGTGWGTRCAA	BA1406R-N715	CAAGCAGAAGACGGCATACGAGATCCTGAGATGTCTCGTGGGCTCGGAGATGTGTATAAGAGACAGACGGGCRGTGWGTRCAA
CAAGCAGAAGACGGCATACGAGAT	N716	TAGCGAGT	GTCTCGTGGGCTCGGAGATGTGTATAAGAGACAG	ACGGGCRGTGWGTRCAA	BA1406R-N716	CAAGCAGAAGACGGCATACGAGATTAGCGAGTGTCTCGTGGGCTCGGAGATGTGTATAAGAGACAGACGGGCRGTGWGTRCAA
CAAGCAGAAGACGGCATACGAGAT	N718	GTAGCTCC	GTCTCGTGGGCTCGGAGATGTGTATAAGAGACAG	ACGGGCRGTGWGTRCAA	BA1406R-N718	CAAGCAGAAGACGGCATACGAGATGTAGCTCCGTCTCGTGGGCTCGGAGATGTGTATAAGAGACAGACGGGCRGTGWGTRCAA
CAAGCAGAAGACGGCATACGAGAT	N719	TACTACGC	GTCTCGTGGGCTCGGAGATGTGTATAAGAGACAG	ACGGGCRGTGWGTRCAA	BA1406R-N719	CAAGCAGAAGACGGCATACGAGATTACTACGCGTCTCGTGGGCTCGGAGATGTGTATAAGAGACAGACGGGCRGTGWGTRCAA
CAAGCAGAAGACGGCATACGAGAT	N720	AGGCTCCG	GTCTCGTGGGCTCGGAGATGTGTATAAGAGACAG	ACGGGCRGTGWGTRCAA	BA1406R-N720	CAAGCAGAAGACGGCATACGAGATAGGCTCCGGTCTCGTGGGCTCGGAGATGTGTATAAGAGACAGACGGGCRGTGWGTRCAA
CAAGCAGAAGACGGCATACGAGAT	N721	GCAGCGTA	GTCTCGTGGGCTCGGAGATGTGTATAAGAGACAG	ACGGGCRGTGWGTRCAA	BA1406R-N721	CAAGCAGAAGACGGCATACGAGATGCAGCGTAGTCTCGTGGGCTCGGAGATGTGTATAAGAGACAGACGGGCRGTGWGTRCAA
CAAGCAGAAGACGGCATACGAGAT	N722	CTGCGCAT	GTCTCGTGGGCTCGGAGATGTGTATAAGAGACAG	ACGGGCRGTGWGTRCAA	BA1406R-N722	CAAGCAGAAGACGGCATACGAGATCTGCGCATGTCTCGTGGGCTCGGAGATGTGTATAAGAGACAGACGGGCRGTGWGTRCAA
CAAGCAGAAGACGGCATACGAGAT	N723	GAGCGCTA	GTCTCGTGGGCTCGGAGATGTGTATAAGAGACAG	ACGGGCRGTGWGTRCAA	BA1406R-N723	CAAGCAGAAGACGGCATACGAGATGAGCGCTAGTCTCGTGGGCTCGGAGATGTGTATAAGAGACAGACGGGCRGTGWGTRCAA
CAAGCAGAAGACGGCATACGAGAT	N724	CGCTCAGT	GTCTCGTGGGCTCGGAGATGTGTATAAGAGACAG	ACGGGCRGTGWGTRCAA	BA1406R-N724	CAAGCAGAAGACGGCATACGAGATCGCTCAGTGTCTCGTGGGCTCGGAGATGTGTATAAGAGACAGACGGGCRGTGWGTRCAA
CAAGCAGAAGACGGCATACGAGAT	N726	GTCTTAGG	GTCTCGTGGGCTCGGAGATGTGTATAAGAGACAG	ACGGGCRGTGWGTRCAA	BA1406R-N726	CAAGCAGAAGACGGCATACGAGATGTCTTAGGGTCTCGTGGGCTCGGAGATGTGTATAAGAGACAGACGGGCRGTGWGTRCAA
CAAGCAGAAGACGGCATACGAGAT	N727	ACTGATCG	GTCTCGTGGGCTCGGAGATGTGTATAAGAGACAG	ACGGGCRGTGWGTRCAA	BA1406R-N727	CAAGCAGAAGACGGCATACGAGATACTGATCGGTCTCGTGGGCTCGGAGATGTGTATAAGAGACAGACGGGCRGTGWGTRCAA
CAAGCAGAAGACGGCATACGAGAT	N728	TAGCTGCA	GTCTCGTGGGCTCGGAGATGTGTATAAGAGACAG	ACGGGCRGTGWGTRCAA	BA1406R-N728	CAAGCAGAAGACGGCATACGAGATTAGCTGCAGTCTCGTGGGCTCGGAGATGTGTATAAGAGACAGACGGGCRGTGWGTRCAA
CAAGCAGAAGACGGCATACGAGAT	N729	GACGTCGA	GTCTCGTGGGCTCGGAGATGTGTATAAGAGACAG	ACGGGCRGTGWGTRCAA	BA1406R-N729	CAAGCAGAAGACGGCATACGAGATGACGTCGAGTCTCGTGGGCTCGGAGATGTGTATAAGAGACAGACGGGCRGTGWGTRCAA
Columns in red were from Nextera XT v2
Primer sequences from Comeau et al. (2011)
